# Supplementary material for: PDA@BN@SiO 2 @OTS coated superhydrophobic paper with good mechanical durability and self-cleaning function for oil-water separation
Source: Research Square preprint supplement (doi:10.21203/rs.3.rs-7275090/v1), 2025-10-29
Supplement: Supplementary file 1 [file f19a167114ee952d0d3d93cb.docx]

**Highlights**

1. A simple immersion coating method was employed to modify the filter paper to get a superhydrophobic paper.

2. High oil-water separation efficiency (> 99.0%) and W/O emulsions separation efficiency (> 89.2%) had been achieved.

3. The modified paper showed good anti-fouling and self-cleaning properties with a water contact angle of 165°.
